# Supplementary material
Source: publisher figshare collection journal article supplement (https://sage.figshare.com/ndownloader/files/24262802)
Supplement: Supplementary file 1 [file 24262802]

## Sheet: Table A1
Table A1 List of vulnerable components of the building.
#	Component	Description	Quantity*	Group	Floor
					Ground	Typical	Roof
1	B2011.102	Exterior wall - light framed wood walls	See Table 2	S	-	X	X
2	B1071.002	Interior light framed wood walls	See Table 2	S	-	X	X
3	C1011.011a	Studded wall partition	See Table 2	NDS	-	X	X
4	B2022.001	Curtain wall	4.8 in x direction 14.4 in y direction	NDS	-	X	X
5	C3011.001a	Wall partition	1.33 in each direction	NDS	-	X	X
6	C3032.003c	Suspended ceiling	2.76	NAS	-	X	X
7	D2021.013a	Cold water piping	0.07	NAS	-	X	X
8	D2022.013a	Hot water piping	0.737	NAS	-	X	X
9	D2022.023a	Hot water piping with large diameter	0.14	NAS	-	X	X
10	D2031.013b	Sanitary wastewater piping	0.437	NAS	-	X	X
11	D3041.011c	Metal ducting	0.23	NAS	-	X	X
12	D3041.032c	HVAC drops	3.69	NAS	-	X	X
13	D3041.041b	VAV box	2.76	NAS	-	X	X
14	D5012.021a	Low voltage switchgear	0.23	NAS	-	X	X
15	D4011.023a	Fire sprinkler	1.014	NAS	-	X	X
16	D4011.033a	Fire sprinkler drop	0.55	NAS	-	X	X
17	C3021.001p	Generic floor covering	5824	NAS	-	X	X
18	B3011.011	Roof tile	32	NAS	-	-	X
* Quantity as per FEMA P-58.
Acronyms: S=Structural, NDS=Nonstructural displacement sensitive, and NAS=Nonstructural acceleration sensitive

## Sheet: Table A2 
Table A2 List of building walls.
Story	Structural wall*				Nonstructural wall**
	E-W		N-S		E-W	N-S
	Exterior	Interior	Exterior	Interior	Exterior	Interior
1	3.36	21.84	5.04	10.92	0.258462	1.61538
2	3.36	21.84	5.04	10.92	0.258462	1.61538
3	3.36	21.84	4.2	10.92	0.258462	1.68
4	1.68	8.4	1.68	8.4	1.42154	2.06769
* unit: SF100 ** unit: SF1300
